# Supplementary material for: Further validation of the Gothenburg Trismus Questionnaire (GTQ)
Source: PubMed Central journal article supplement (PMC7746186; doi:10.1371/journal.pone.0243805), 2020-12-17
Supplement: pone.0243805.s002.pdf [file pone.0243805.s002.pdf]

## Gothenburg Trismus Questionnaire (GTQ 2) Items 1-23; if training 24-29

This questionnaire contains questions related to mouth opening and jaw related problems. Please read each question carefully and answer by marking the alternative that best applies to you. Answer all questions and mark only one alternative for each question.

During the **last week**, have you:

|                                                                   | <b>Not at all</b>                     | <b>Mild</b>                           | <b>Moderate</b>                       | <b>Severe</b>                         | <b>Very severe</b>                    |
|-------------------------------------------------------------------|---------------------------------------|---------------------------------------|---------------------------------------|---------------------------------------|---------------------------------------|
| 1. Felt fatigue in your jaw                                       | <input type="checkbox"/> <sub>1</sub> | <input type="checkbox"/> <sub>2</sub> | <input type="checkbox"/> <sub>3</sub> | <input type="checkbox"/> <sub>4</sub> | <input type="checkbox"/> <sub>5</sub> |
| 2. Felt stiffness in your jaw                                     | <input type="checkbox"/> <sub>1</sub> | <input type="checkbox"/> <sub>2</sub> | <input type="checkbox"/> <sub>3</sub> | <input type="checkbox"/> <sub>4</sub> | <input type="checkbox"/> <sub>5</sub> |
| 3. Felt pain in your face                                         | <input type="checkbox"/> <sub>1</sub> | <input type="checkbox"/> <sub>2</sub> | <input type="checkbox"/> <sub>3</sub> | <input type="checkbox"/> <sub>4</sub> | <input type="checkbox"/> <sub>5</sub> |
| 4. Felt pain in your jaw                                          | <input type="checkbox"/> <sub>1</sub> | <input type="checkbox"/> <sub>2</sub> | <input type="checkbox"/> <sub>3</sub> | <input type="checkbox"/> <sub>4</sub> | <input type="checkbox"/> <sub>5</sub> |
| 5. Felt pain moving your jaw (opening mouth/chewing)              | <input type="checkbox"/> <sub>1</sub> | <input type="checkbox"/> <sub>2</sub> | <input type="checkbox"/> <sub>3</sub> | <input type="checkbox"/> <sub>4</sub> | <input type="checkbox"/> <sub>5</sub> |
| 6. Had problems when opening your mouth wide or taking a big bite | <input type="checkbox"/> <sub>1</sub> | <input type="checkbox"/> <sub>2</sub> | <input type="checkbox"/> <sub>3</sub> | <input type="checkbox"/> <sub>4</sub> | <input type="checkbox"/> <sub>5</sub> |
| 7. Felt pain in your jaw muscles                                  | <input type="checkbox"/> <sub>1</sub> | <input type="checkbox"/> <sub>2</sub> | <input type="checkbox"/> <sub>3</sub> | <input type="checkbox"/> <sub>4</sub> | <input type="checkbox"/> <sub>5</sub> |
| 8. Had problem yawning                                            | <input type="checkbox"/> <sub>1</sub> | <input type="checkbox"/> <sub>2</sub> | <input type="checkbox"/> <sub>3</sub> | <input type="checkbox"/> <sub>4</sub> | <input type="checkbox"/> <sub>5</sub> |
| 9. Had noises from your jaw                                       | <input type="checkbox"/> <sub>1</sub> | <input type="checkbox"/> <sub>2</sub> | <input type="checkbox"/> <sub>3</sub> | <input type="checkbox"/> <sub>4</sub> | <input type="checkbox"/> <sub>5</sub> |

Due to your jaw problems, to what extent are you limited or incapable of:

|                           | <b>Not at all</b>                     | <b>Mild</b>                           | <b>Moderate</b>                       | <b>Severe</b>                         | <b>Very severe</b>                    |
|---------------------------|---------------------------------------|---------------------------------------|---------------------------------------|---------------------------------------|---------------------------------------|
| 10. Eating solid food     | <input type="checkbox"/> <sub>1</sub> | <input type="checkbox"/> <sub>2</sub> | <input type="checkbox"/> <sub>3</sub> | <input type="checkbox"/> <sub>4</sub> | <input type="checkbox"/> <sub>5</sub> |
| 11. Putting food in mouth | <input type="checkbox"/> <sub>1</sub> | <input type="checkbox"/> <sub>2</sub> | <input type="checkbox"/> <sub>3</sub> | <input type="checkbox"/> <sub>4</sub> | <input type="checkbox"/> <sub>5</sub> |
| 12. Eating soft food      | <input type="checkbox"/> <sub>1</sub> | <input type="checkbox"/> <sub>2</sub> | <input type="checkbox"/> <sub>3</sub> | <input type="checkbox"/> <sub>4</sub> | <input type="checkbox"/> <sub>5</sub> |
| 13. Bite off              | <input type="checkbox"/> <sub>1</sub> | <input type="checkbox"/> <sub>2</sub> | <input type="checkbox"/> <sub>3</sub> | <input type="checkbox"/> <sub>4</sub> | <input type="checkbox"/> <sub>5</sub> |

Do you usually:

|                            | <b>Not at all</b>                     | <b>Seldom</b>                         | <b>Sometimes</b>                      | <b>Often</b>                          | <b>Very often</b>                     |
|----------------------------|---------------------------------------|---------------------------------------|---------------------------------------|---------------------------------------|---------------------------------------|
| 14. Clench your teeth      | <input type="checkbox"/> <sub>1</sub> | <input type="checkbox"/> <sub>2</sub> | <input type="checkbox"/> <sub>3</sub> | <input type="checkbox"/> <sub>4</sub> | <input type="checkbox"/> <sub>5</sub> |
| 15. Press with your tongue | <input type="checkbox"/> <sub>1</sub> | <input type="checkbox"/> <sub>2</sub> | <input type="checkbox"/> <sub>3</sub> | <input type="checkbox"/> <sub>4</sub> | <input type="checkbox"/> <sub>5</sub> |

**Questions 16-20 are about facial pain**

**By facial pain, we mean pain in the face and/or jaw related to your mouth opening ability**

|     |                                                                                            | No facial pain                        | Mild                                  | Moderate                              | Severe                                | Very severe                           |
|-----|--------------------------------------------------------------------------------------------|---------------------------------------|---------------------------------------|---------------------------------------|---------------------------------------|---------------------------------------|
| 16. | How strong was the worst facial pain you have experienced during <b>the last 24 hours?</b> | <input type="checkbox"/> <sub>1</sub> | <input type="checkbox"/> <sub>2</sub> | <input type="checkbox"/> <sub>3</sub> | <input type="checkbox"/> <sub>4</sub> | <input type="checkbox"/> <sub>5</sub> |
| 17. | How strong was the worst facial pain you have experienced during the <b>last week?</b>     | <input type="checkbox"/> <sub>1</sub> | <input type="checkbox"/> <sub>2</sub> | <input type="checkbox"/> <sub>3</sub> | <input type="checkbox"/> <sub>4</sub> | <input type="checkbox"/> <sub>5</sub> |
| 18. | On average, how strong has your facial pain been during the <b>last week?</b>              | <input type="checkbox"/> <sub>1</sub> | <input type="checkbox"/> <sub>2</sub> | <input type="checkbox"/> <sub>3</sub> | <input type="checkbox"/> <sub>4</sub> | <input type="checkbox"/> <sub>5</sub> |

| During the last week |                                                                                                                       | Not at all                            | A little                              | Moderately                            | Quite a bit                           | Very much                             |
|----------------------|-----------------------------------------------------------------------------------------------------------------------|---------------------------------------|---------------------------------------|---------------------------------------|---------------------------------------|---------------------------------------|
| 19.                  | How much has your facial pain interfered with your social, leisure and family activities?                             | <input type="checkbox"/> <sub>1</sub> | <input type="checkbox"/> <sub>2</sub> | <input type="checkbox"/> <sub>3</sub> | <input type="checkbox"/> <sub>4</sub> | <input type="checkbox"/> <sub>5</sub> |
| 20.                  | How much has your facial pain affected your ability to work (including both gainful employment and household duties)? | <input type="checkbox"/> <sub>1</sub> | <input type="checkbox"/> <sub>2</sub> | <input type="checkbox"/> <sub>3</sub> | <input type="checkbox"/> <sub>4</sub> | <input type="checkbox"/> <sub>5</sub> |

| Questions about mouth opening ability |                                                                                       | Not at all                            | A little                              | Moderately                            | Quite a bit                           | Very much                             |
|---------------------------------------|---------------------------------------------------------------------------------------|---------------------------------------|---------------------------------------|---------------------------------------|---------------------------------------|---------------------------------------|
| 21.                                   | How limited has your ability to open your mouth been during <b>the last 24 hours?</b> | <input type="checkbox"/> <sub>1</sub> | <input type="checkbox"/> <sub>2</sub> | <input type="checkbox"/> <sub>3</sub> | <input type="checkbox"/> <sub>4</sub> | <input type="checkbox"/> <sub>5</sub> |

| During the last week |                                                                                                                                    | No mouth opening limitation           | A little                              | Moderately                            | Quite a bit                           | Very much                             |
|----------------------|------------------------------------------------------------------------------------------------------------------------------------|---------------------------------------|---------------------------------------|---------------------------------------|---------------------------------------|---------------------------------------|
| 22.                  | How much has your mouth opening limitation interfered with your social, leisure and family activities?                             | <input type="checkbox"/> <sub>1</sub> | <input type="checkbox"/> <sub>2</sub> | <input type="checkbox"/> <sub>3</sub> | <input type="checkbox"/> <sub>4</sub> | <input type="checkbox"/> <sub>5</sub> |
| 23.                  | How much has your mouth opening limitation affected your ability to work (including both gainful employment and household duties)? | <input type="checkbox"/> <sub>1</sub> | <input type="checkbox"/> <sub>2</sub> | <input type="checkbox"/> <sub>3</sub> | <input type="checkbox"/> <sub>4</sub> | <input type="checkbox"/> <sub>5</sub> |

Mark the parts of the face where you feel any facial pain. You can select several options. If you do not experience any facial pain, skip this image.

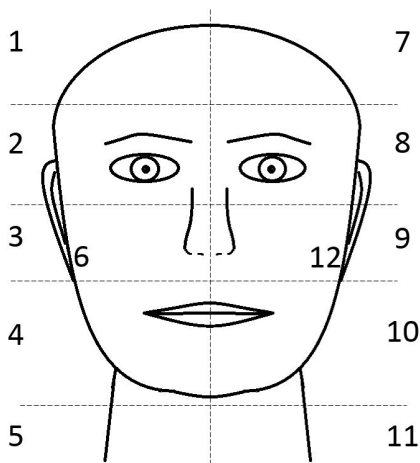

**Right side of the face**

- 1. Forehead right
- 2. Around the right eye
- 3. Middle face right
- 4. Mouth/chin right
- 5. Neck right
- 6. Temporomandibular joint right

**Left side of the face**

- 7. Forehead left
- 8. Around the left eye
- 9. Middle face left
- 10. Mouth/chin left
- 11. Neck left
- 12. Temporomandibular joint left

Below you find some questions about training and the device you might be using. Please read each question carefully and answer by marking the alternative that best applies to you.

24. Are you training to improve your ability to open your mouth (with a mouth stretching device, using your fingers to stretch or something else)?

Yes <sup>(1)</sup>     No <sup>(0)</sup>    If yes what kind of training do you perform?

(Training with a mouth stretching device, using your fingers to stretch or something else)

---

|                                                                                                                | Not at<br>all            | A little                 | Moderately               | Quite<br>a bit           | Very<br>much             |
|----------------------------------------------------------------------------------------------------------------|--------------------------|--------------------------|--------------------------|--------------------------|--------------------------|
|                                                                                                                | 1                        | 2                        | 3                        | 4                        | 5                        |
| 25. Is the training/training device used to improve your mouth opening ability <i>uncomfortable to use</i> ?   | <input type="checkbox"/> | <input type="checkbox"/> | <input type="checkbox"/> | <input type="checkbox"/> | <input type="checkbox"/> |
| 26. Is it <i>physically exhausting</i> to train/use the training device to improve your mouth opening ability? | <input type="checkbox"/> | <input type="checkbox"/> | <input type="checkbox"/> | <input type="checkbox"/> | <input type="checkbox"/> |
| 27. Does it <i>take a lot of time</i> doing the mouth opening exercises?                                       | <input type="checkbox"/> | <input type="checkbox"/> | <input type="checkbox"/> | <input type="checkbox"/> | <input type="checkbox"/> |
| 28. Do you find the exercises <i>efficient, that is - do they help</i> ?                                       | <input type="checkbox"/> | <input type="checkbox"/> | <input type="checkbox"/> | <input type="checkbox"/> | <input type="checkbox"/> |

29. On average, how many times a day do you practise?

| Not at all                            | Once a day                            | Twice a day                           | Three times<br>a day                  | Four times<br>a day                   | Five or more<br>times a day           |
|---------------------------------------|---------------------------------------|---------------------------------------|---------------------------------------|---------------------------------------|---------------------------------------|
| <input type="checkbox"/> <sub>0</sub> | <input type="checkbox"/> <sub>1</sub> | <input type="checkbox"/> <sub>2</sub> | <input type="checkbox"/> <sub>3</sub> | <input type="checkbox"/> <sub>4</sub> | <input type="checkbox"/> <sub>5</sub> |
